# Supplementary material for: Real-life use of vasopressors and inotropes in cardiogenic shock—observation is necessarily ‘theory-laden’
Source: Crit Care. 2016 Sep 26;20:293. doi: 10.1186/s13054-016-1473-4 (PMC5036283; doi:10.1186/s13054-016-1473-4)
Supplement: Additional file 1: — Contingency table with data used to calculate crude odd ratios of death for each vasoactive agent. (XLSX 11 kb) [file 13054_2016_1473_MOESM1_ESM.xlsx]

## Sheet: Sheet1
Crude Mortality Rate
	Any dopamine	No dopamine	Any norepinephrine	No norepinephrine	Any epinephrine	No epinephrine
All	302	289	166	425	165	426
Died	70	47	46	71	62	55
Survived	217	202	111	308	95	324
Odds Ratio	1.3864		1.7977		3.8446
95th CI	0.9143-2.1024		1.1697-2.7630		2.5033-5.9047
p-value	0.124		0.0075		<0.0001
Standardised Mortality Rate
	Any dopamine	Any norepinephrine	Any epinephrine
Observed mortality (O)	70	46	62
Expected mortality €	16.7358	42.684	34.0884
SMR=O/E	4.18265	1.07769	1.8188
s.e.=(√O/E)	0.499923	0.158896	0.230988
Lower 95th CI	3.20281	0.76625	1.36606
Upper 95th CI	5.1625	1.38912	2.27154
